# Supplementary material for: Exploring Responsiveness to Highly Challenging Balance and Gait Training in Parkinson's Disease
Source: PubMed Central journal article supplement — Mov Disord Clin Pract. 2024 Aug 21;11(11):1410–20. doi: 10.1002/mdc3.14194 (PMC11542401; doi:10.1002/mdc3.14194), 2024-08-21
Supplement: MDC3-11-1410-s001.pdf [file MDC3-11-1410-s001.pdf]

Supplement to “Exploring responsiveness to highly challenging balance and gait training in Parkinson’s disease”, Albrecht et al.

## Table of Contents

|                                                                                                                                                                                  |          |
|----------------------------------------------------------------------------------------------------------------------------------------------------------------------------------|----------|
| <b>METHODS</b> .....                                                                                                                                                             | <b>1</b> |
| STEPS PER DAY .....                                                                                                                                                              | 1        |
| DATA IMPUTATION .....                                                                                                                                                            | 1        |
| RANDOM FOREST .....                                                                                                                                                              | 2        |
| VARIABLE IMPORTANCE.....                                                                                                                                                         | 2        |
| <b>RESULTS</b> .....                                                                                                                                                             | <b>2</b> |
| GAIT RESPONDERS .....                                                                                                                                                            | 2        |
| PHYSICAL ACTIVITY RESPONDERS .....                                                                                                                                               | 2        |
| <b>DISCUSSION</b> .....                                                                                                                                                          | <b>3</b> |
| CHARACTERIZATION OF HIGH RESPONDERS .....                                                                                                                                        | 3        |
| <b>FIGURES</b> .....                                                                                                                                                             | <b>4</b> |
| SUPPLEMENTAL FIGURE 1 VARIABLE IMPORTANCE OF THE GAIT RESPONDERS ANALYSIS.....                                                                                                   | 4        |
| SUPPLEMENTAL FIGURE 2 VARIABLE IMPORTANCE OF THE STEP RESPONDERS ANALYSIS.....                                                                                                   | 5        |
| <b>TABLES</b> .....                                                                                                                                                              | <b>6</b> |
| SUPPLEMENTAL TABLE 1 COHEN’S KAPPA FOR THE RESPONDER DOMAIN PREDICTION .....                                                                                                     | 6        |
| SUPPLEMENTAL TABLE 2 MEAN DECREASE ACCURACY FOR BALANCE DOMAIN RESPONDERS.....                                                                                                   | 6        |
| SUPPLEMENTAL TABLE 3 DEMOGRAPHICS OF THE PARTICIPANTS IN THE HiBALANCE INTERVENTION GROUP DIVIDED INTO RESPONDERS ACCORDING TO GAIT VELOCITY DIFFERENCES (POST-PRE) .....        | 7        |
| SUPPLEMENTAL TABLE 4 MEAN DECREASE ACCURACY FOR GAIT DOMAIN RESPONDERS .....                                                                                                     | 8        |
| SUPPLEMENTAL TABLE 5 DEMOGRAPHICS OF THE PARTICIPANTS IN THE HiBALANCE INTERVENTION GROUP DIVIDED INTO PHYSICAL ACTIVITY RESPONDERS ACCORDING TO STEPS PER DAY DIFFERENCES ..... | 9        |
| SUPPLEMENTAL TABLE 6 MEAN DECREASE ACCURACY FOR STEP DOMAIN RESPONDERS .....                                                                                                     | 10       |

## Methods

### Steps per Day

The participants of the randomized controlled trial wore an Actigraph accelerometer for seven days on the hip (Franzén et al.,2019). Data collection took place in two waves in spring and autumn, thus we assume that seasonal effects of physical activity are averaged out. Further, physical activity patterns does not differ between weekdays and weekend days (Benka Wallén et al., 2015).

### Data Imputation

We imputed missing variables with Random Forest regression as implemented in the "missForest" R package. Random Forest imputation is suitable for our data since it can be applied to mixed data types, can work with multicollinearity, and makes no assumptions about the relationship between variables. In short, missing values are marked as a response variable and the original data as training data. The Random Forest predicts these missing values based on the original data. Values are replaced by a better prediction in every

iteration. The difference between the predicted and previous dataset is computed and the imputation stops when this difference increases once. The dataset computed before the last iteration will be the final imputed data set.

Overall, we imputed data for ten people with PD (PwPD), where seven PwPD had up to two missing values in the variables of interest. There was one participant who had no post data for balance performance (Mini-BEST) and gait velocity, i.e., post values were imputed and thus also the responder domain grouping of this participant was based on these imputed values. Six PwPD had no post-measurement of steps per day, thus their physical activity responder domain was also based on imputed data.

## Random Forest

### Variable Importance

As a by-product, Random Forest produces measures of ranking the variables in their relevance for prediction. Two measures can be obtained, the Gini index - shown to be highly biased - and the accuracy decrease - a permutation-based measure (Couronné, Probst, & Boulesteix, 2018). In the present study, we choose the mean decrease in accuracy. The measure is directly based on the Random Forest accuracy since it is calculated as the mean difference in accuracy between the OOB errors of the original dataset and a permuted dataset. In short, after every decision tree construction, the values of a variable in the OOB dataset are permuted, i.e., replaced by random values, to change the relation to the prediction variable (i.e., responsiveness level). This permuted dataset is used to calculate the predictive accuracy of the OOB data by running down the decision tree. The difference between this accuracy and the accuracy of the original dataset shows the importance of the variable.

## Results

### Gait Responders

Anxiety (HADS), balance confidence (ABC), and the physical activity subtype were the most important variables for responsiveness classification (e-Table 4, e-Figure 1, I). The mean decrease in classification accuracy for high responsiveness was the highest for anxiety (HADS) and age. Only anxiety (HADS) had a high classification accuracy for non-responders. Balance confidence (ABC) was the most important variable for low responsiveness classification.

Partial dependence on Anxiety (HADS) showed that lower anxiety ( $\leq 2$  points) classified high responsiveness, while higher anxiety classified non-responders ( $\geq 3$  points) (e-Figure 1, II). Lower balance confidence ( $ABC \leq 89$ ) was indicative of non-responders, while higher balance confidence ( $> 93$ ) classified low responsiveness. Regarding the physical activity subtype, the classification of responsiveness levels is inconclusive.

### Physical Activity Responders

Balance confidence (ABC), followed by motor subtype, and fall history had the highest importance for responsiveness classification for the overall model, high responders, and non-responders (e-Table 6, e-Figure 2, I).

Partial dependence showed that people with PD with higher balance confidence ( $ABC \geq 96$ ) were likely to be high responders, while lower balance confidence classified non-responders (e-Figure 2, II). Regarding the motor subtype, tremor-dominant people with PD were more likely to be high responders, while postural instability/gait difficulty and indeterminate subtypes were more likely to be non-responders (e-Figure 2, III). Fall history showed only high classification probabilities for non-responders which decreases with the number of falls and does not predict high responders (e-Figure 2, IV).

## Discussion

### Characterization of High Responders

We performed subject-level responder analyses since we expected to see that not every individual shows high responsiveness in the balance, gait, and physical activity domains due to the disease heterogeneity of PD regarding symptoms, subtypes, and progression. Different studies find different variables indicative of balance response which raises the question if this is due to heterogeneity in study protocols, analysis methods, or may be mediated by other unknown factors. It is general clinical knowledge that PwPD with lower physical functioning may have more room to improve following an intervention. On the other hand, too low physical functioning may be a limiting factor since motor learning takes longer in PwPD (Allen et al., 2011). Indeed, descriptively, those that responded most in our cohort in the balance domain, had the worst balance performance (i.e., lowest values on the Mini-BESTest), slowest gait velocity, fewest steps per day, and highest disease severity (MDS-UPDRS) compared with the other two responsiveness levels. Nevertheless, the aforementioned variables did not differ significantly between responsiveness levels when compared statistically, which could also be a power problem.

# Figures

## Gait Domain Responders

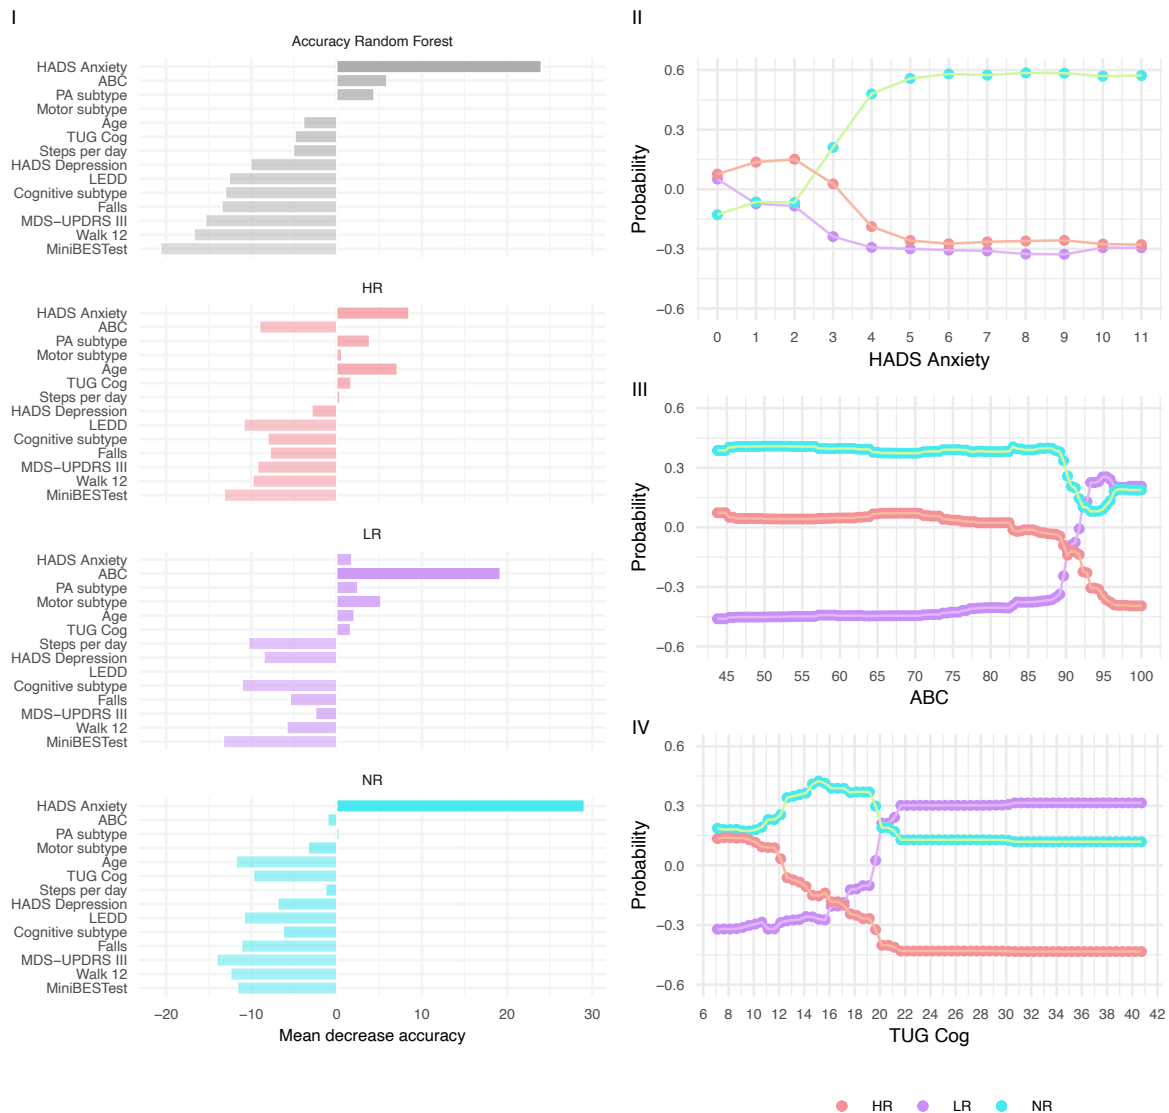

Supplemental Figure 1 Variable importance of the gait responders analysis

I Mean decrease in the accuracy of the Random Forest prediction for each variable used for the decision trees. The decreased accuracy is shown as a percent increase in the misclassification rate as compared to the out-of-bag rate. Classification probability for each responsiveness level is shown as a function of predicted values of classification variables: II Partial dependence on anxiety (HADS), III Partial dependence on balance confidence (ABC), and IV Partial dependence on Timed Up and Go test with a serial subtraction task (TUG Cog) in s. Abbreviations: ABC= Activities-specific Balance Confidence scale, HADS= Hospital Anxiety and Depression scale, HR= high responder, LR= low responder, LEDD= levodopa-equivalent daily dosage, MDS-UPDRS-III= Movement Disorder Society-sponsored Revision of the Unified Parkinson’s Disease Rating Scale – Motor severity, NR= non-responder, PA= physical activity, TUG Cog=Timed Up and Go test with a serial subtraction task, Walk 12= Walking Impact Scale.

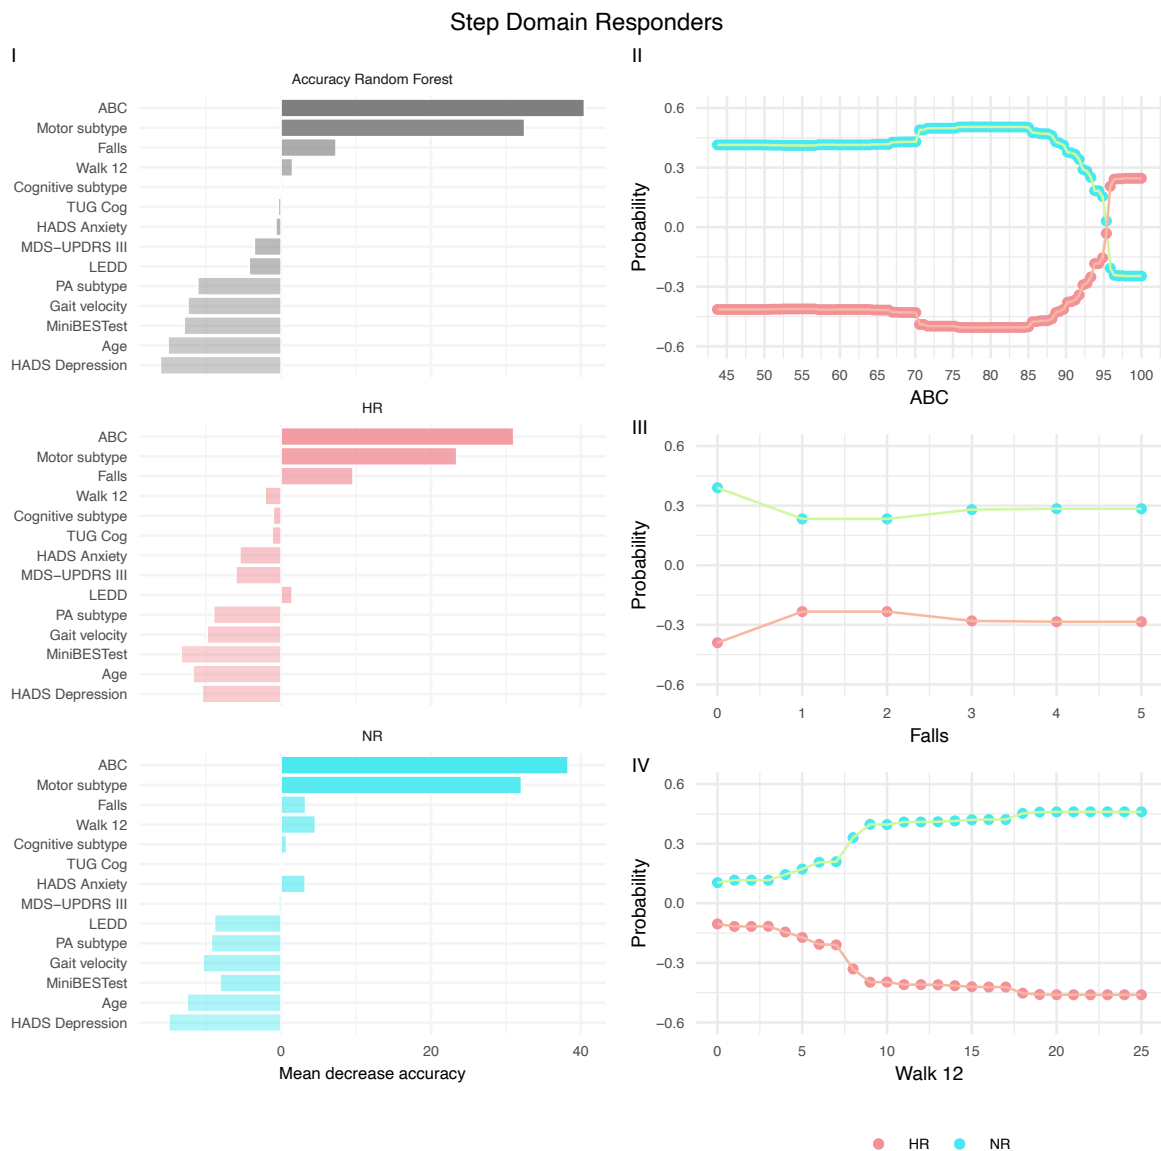

Supplemental Figure 2 Variable importance of the step responders analysis

I Mean decrease in the accuracy of the Random Forest prediction for each variable used for the decision trees. The decreased accuracy is shown as a percent increase in the misclassification rate as compared to the out-of-bag rate. Classification probability for each responsiveness level is shown as a function of predicted values of classification variables: II Partial dependence on balance confidence (ABC), III Partial dependence on the number of falls within 6 months before the HiBalance intervention, and IV Partial dependence on self-reported walking limitations (Walk 12). Abbreviations: ABC= Activities-specific Balance Confidence scale, HADS= Hospital Anxiety and Depression scale, HR= high responder, LR= low responder, LEDD= levodopa-equivalent daily dosage, MDS-UPDRS-III= Movement Disorder Society-sponsored Revision of the Unified Parkinson’s Disease Rating Scale – Motor severity, NR= non-responder, PA= physical activity, TUG= Timed Up and Go, TUG Cog= Timed Up and Go test with a serial subtraction task, Walk 12= Walking Impact Scale.

## Tables

### Supplemental Table 1 Cohen's Kappa for the responder domain prediction

Kappa is calculated from the confusion matrix of the respective responder domain Random Forest. An agreement was seen as a match between the Random Forest prediction and the true responsiveness label (diagonal of the confusion matrix, Table 2). Disagreements were considered for the weighted kappa (off-diagonal of the confusion matrix, Table 2).

|                                            | <i>Lower</i> | <i>Estimate</i> | <i>Upper</i> |
|--------------------------------------------|--------------|-----------------|--------------|
| <b>Balance domain responders</b>           |              |                 |              |
| <i>unweighted kappa</i>                    | -0.1531468   | 0.09118541      | 0.3355177    |
| <i>weighted kappa</i>                      | -0.1764257   | 0.14446228      | 0.4653503    |
| <b>Gait domain responders</b>              |              |                 |              |
| <i>unweighted kappa</i>                    | -0.1730624   | 0.05974843      | 0.2925592    |
| <i>weighted kappa</i>                      | -0.3644092   | -0.05507246     | 0.2542643    |
| <b>Physical activity domain responders</b> |              |                 |              |
| <i>unweighted kappa</i>                    | -0.1736512   | 0.1459854       | 0.465622     |
| <i>weighted kappa</i>                      | -0.1736512   | 0.1459854       | 0.465622     |

*Weighted kappa is (probability of observed matches - probability of expected matches)/(1 - probability of expected matches). Unweighted kappa just considers the matches on the main diagonal of the confusion matrix. Weighted kappa considers also the off-diagonal.*

### Supplemental Table 2 Mean decrease accuracy for balance domain responders

Variable Importance as measured by mean decrease accuracy computed by permuting the variables' values and running the prediction again. Columns two to four are the responsiveness level-specific measures. The last two columns are the mean decrease in accuracy over all responsiveness levels.

| <i>Variables</i>                 | <i>NR Mean Decrease Accuracy</i> | <i>LR Mean Decrease Accuracy</i> | <i>HR Mean Decrease Accuracy</i> | <i>Mean Decrease Accuracy</i> | <i>SD Mean Decrease Accuracy</i> |
|----------------------------------|----------------------------------|----------------------------------|----------------------------------|-------------------------------|----------------------------------|
| <b>Falls last 6 months</b>       | 24.6487815                       | 33.2855903                       | -5.0635276                       | 32.9415591                    | 0.00047892                       |
| <b>Gait velocity</b>             | -13.392159                       | 19.6510777                       | 47.9971168                       | 30.8464907                    | 0.00051639                       |
| <b>TUG Cog</b>                   | 23.6481363                       | 8.10595718                       | -11.528559                       | 13.4298812                    | 0.0004602                        |
| <b>Walk 12</b>                   | 8.88936919                       | -2.2063315                       | 15.5663127                       | 12.8921815                    | 0.00040635                       |
| <b>HADS Anxiety</b>              | -1.4107885                       | 15.3511025                       | 4.8120569                        | 9.43101659                    | 0.0003381                        |
| <b>Physical activity subtype</b> | -1.3288044                       | 14.4931502                       | 0.25525931                       | 8.72904944                    | 0.00035865                       |
| <b>Steps per day</b>             | 9.19590558                       | -8.938868                        | 5.37276727                       | 3.0016594                     | 0.00038557                       |
| <b>HADS Depression</b>           | -12.76054                        | 8.01360182                       | -7.7239751                       | -7.5439095                    | 0.00028147                       |
| <b>Cognitive subtype</b>         | -2.5708215                       | -7.1187154                       | -8.4487349                       | -8.9852345                    | 0.00023197                       |
| <b>LEDD</b>                      | -6.2338141                       | -12.545679                       | 0.41812368                       | -10.289454                    | 0.00032588                       |
| <b>Age</b>                       | -8.2415976                       | -9.2352276                       | -2.433367                        | -10.725637                    | 0.00028228                       |
| <b>MDS-UPDRS III</b>             | -5.7512317                       | -16.809648                       | 0.70693768                       | -12.879468                    | 0.0003213                        |
| <b>Motor subtype</b>             | -9.9925766                       | -7.7128488                       | -6.9283225                       | -12.884551                    | 0.00019791                       |
| <b>ABC</b>                       | -10.333449                       | -16.826561                       | -12.996884                       | -20.897394                    | 0.00029017                       |

*Abbreviations: ABC= Activities-specific Balance Confidence scale, HADS= Hospital Anxiety and Depression scale, HR = high responder, LEDD= levodopa equivalent daily dose, LR = low responder, MDS-UPDRS= The Movement Disorder Society-sponsored Revision of the Unified Parkinson's Disease Rating Scale, Mini-BESTest= Mini Balance Evaluation Systems Test,*

MoCA= Montreal cognitive assessment, NR = non-responder, SD = standard deviation, TUG= Timed Up and Go, TUG Cog= Timed Up and Go test with a serial subtraction task, Walk 12= Walking Impact Scale.

Supplemental Table 3 Demographics of the participants in the HiBalance intervention group divided into responders according to gait velocity differences (post-pre), non-responders  $\leq 0.04$  m/s, low responders =  $0.13-0.04$ m/s, and high responders  $\geq 0.14$ m/s.

|                                 | <i>Non-responder<br/>(N=17)</i> | <i>Low responder<br/>(N=11)</i> | <i>High responder<br/>(N=11)</i> | <i>Total (N=39)</i> | <i>p value</i>      |
|---------------------------------|---------------------------------|---------------------------------|----------------------------------|---------------------|---------------------|
| <b>Age, yrs</b>                 |                                 |                                 |                                  |                     | 0.957 <sup>1</sup>  |
| Mean                            | 70.18                           | 69.64                           | 71.18                            | 70.31               |                     |
| Range                           | 61.00 - 81.00                   | 62.00 - 83.00                   | 67.00 - 83.00                    | 61.00 - 83.00       |                     |
| <b>Sex, n (%)</b>               |                                 |                                 |                                  |                     | 0.755 <sup>2</sup>  |
| male                            | 10 (58.8%)                      | 8 (72.7%)                       | 7 (63.6%)                        | 25 (64.1%)          |                     |
| female                          | 7 (41.2%)                       | 3 (27.3%)                       | 4 (36.4%)                        | 14 (35.9%)          |                     |
| <b>Cognitive subtype, n (%)</b> |                                 |                                 |                                  |                     | 0.631 <sup>2</sup>  |
| Non-MCI                         | 12 (70.6%)                      | 7 (63.6%)                       | 9 (81.8%)                        | 28 (71.8%)          |                     |
| MCI                             | 5 (29.4%)                       | 4 (36.4%)                       | 2 (18.2%)                        | 11 (28.2%)          |                     |
| <b>Motor subtype, n (%)</b>     |                                 |                                 |                                  |                     | 0.083 <sup>2</sup>  |
| TD                              | 1 (5.9%)                        | 4 (36.4%)                       | 2 (18.2%)                        | 7 (17.9%)           |                     |
| PIGD                            | 12 (70.6%)                      | 4 (36.4%)                       | 9 (81.8%)                        | 25 (64.1%)          |                     |
| IND                             | 4 (23.5%)                       | 3 (27.3%)                       | 0 (0.0%)                         | 7 (17.9%)           |                     |
| <b>PA subtype, n (%)</b>        |                                 |                                 |                                  |                     | 0.399 <sup>2</sup>  |
| Sedentary                       | 1 (5.9%)                        | 1 (9.1%)                        | 3 (27.3%)                        | 5 (12.8%)           |                     |
| Light movers                    | 8 (47.1%)                       | 3 (27.3%)                       | 3 (27.3%)                        | 14 (35.9%)          |                     |
| Steady movers                   | 8 (47.1%)                       | 7 (63.6%)                       | 5 (45.5%)                        | 20 (51.3%)          |                     |
| <b>LEDD pre, mg</b>             |                                 |                                 |                                  |                     | 0.240 <sup>1</sup>  |
| Mean                            | 668.32                          | 456.36                          | 714.73                           | 621.63              |                     |
| Range                           | 0.00 - 1164.00                  | 0.00 - 1008.00                  | 226.00 - 1385.00                 | 0.00 - 1385.00      |                     |
| <b>LEDD post, mg</b>            |                                 |                                 |                                  |                     | 0.382 <sup>1</sup>  |
| Mean                            | 671.56                          | 490.00                          | 732.91                           | 645.64              |                     |
| Range                           | 0.00 - 1164.00                  | 100.00 - 1008.00                | 226.00 - 1485.00                 | 0.00 - 1485.00      |                     |
| <b>MDS-UPDRS III</b>            |                                 |                                 |                                  |                     | 0.995 <sup>1</sup>  |
| Mean                            | 31.47                           | 30.91                           | 31.82                            | 31.41               |                     |
| Range                           | 11.00 - 70.00                   | 20.00 - 48.00                   | 10.00 - 60.00                    | 10.00 - 70.00       |                     |
| <b>MDS-UPDRS Total</b>          |                                 |                                 |                                  |                     | 0.593 <sup>1</sup>  |
| Mean                            | 53.82                           | 48.82                           | 49.45                            | 51.18               |                     |
| Range                           | 24.00 - 102.00                  | 23.00 - 80.00                   | 22.00 - 110.00                   | 22.00 - 110.00      |                     |
| <b>MoCA</b>                     |                                 |                                 |                                  |                     | 0.027 <sup>1</sup>  |
| Mean                            | 27.06                           | 24.27                           | 26.45                            | 26.10               |                     |
| Range                           | 23.00 - 30.00                   | 21.00 - 29.00                   | 24.00 - 29.00                    | 21.00 - 30.00       |                     |
| <b>Mini-BESTest</b>             |                                 |                                 |                                  |                     | 0.885 <sup>1</sup>  |
| Mean                            | 21.29                           | 20.82                           | 21.27                            | 21.15               |                     |
| Range                           | 14.00 - 27.00                   | 16.00 - 25.00                   | 15.00 - 26.00                    | 14.00 - 27.00       |                     |
| <b>Mini-BESTest post-pre</b>    |                                 |                                 |                                  |                     | 0.112 <sup>1</sup>  |
| Mean                            | 0.18                            | 1.82                            | 1.45                             | 1.00                |                     |
| Range                           | -3.00 - 3.00                    | -2.00 - 8.00                    | -3.00 - 4.00                     | -3.00 - 8.00        |                     |
| <b>Gait velocity, cm/s</b>      |                                 |                                 |                                  |                     | 0.017 <sup>1</sup>  |
| Mean                            | 131.09                          | 120.99                          | 112.85                           | 123.10              |                     |
| Range                           | 109.70 - 150.60                 | 96.80 - 150.90                  | 82.20 - 143.50                   | 82.20 - 150.90      |                     |
| <b>Gait velocity post-pre</b>   |                                 |                                 |                                  |                     | <0.001 <sup>1</sup> |
| Mean                            | -3.97                           | 7.90                            | 20.17                            | 6.19                |                     |
| Range                           | -20.10 - 3.40                   | 4.80 - 13.90                    | 15.10 - 30.80                    | -20.10 - 30.80      |                     |
| <b>Steps per day</b>            |                                 |                                 |                                  |                     | 0.461 <sup>1</sup>  |
| Mean                            | 5736                            | 6070                            | 4605                             | 5511                |                     |
| Range                           | 1689- 10979                     | 1858- 11482                     | 2334 - 8225                      | 1689- 11482         |                     |
| <b>Steps per day post-pre</b>   |                                 |                                 |                                  |                     | 0.447 <sup>1</sup>  |
| Mean                            | -735                            | -217                            | 449                              | -256                |                     |
| Range                           | -2997 - 2458                    | -3561- 3350                     | -1979 - 5830                     | -3561- 5830         |                     |
| <b>TUG</b>                      |                                 |                                 |                                  |                     | 0.537 <sup>1</sup>  |
| Mean                            | 9.89                            | 11.11                           | 11.29                            | 10.63               |                     |
| Range                           | 6.09 - 12.62                    | 7.13 - 18.12                    | 7.31 - 15.68                     | 6.09 - 18.12        |                     |
| <b>TUG Cog</b>                  |                                 |                                 |                                  |                     | 0.392 <sup>1</sup>  |
| Mean                            | 14.41                           | 17.23                           | 12.84                            | 14.76               |                     |
| Range                           | 7.12 - 19.90                    | 9.62 - 40.72                    | 7.85 - 17.28                     | 7.12 - 40.72        |                     |
| <b>Presence intervention, %</b> |                                 |                                 |                                  |                     | 0.094 <sup>1</sup>  |
| Mean                            | 84.71                           | 88.18                           | 80.00                            | 84.36               |                     |

|                           |                |                |               |                |                    |
|---------------------------|----------------|----------------|---------------|----------------|--------------------|
| <i>Range</i>              | 60.00 - 100.00 | 60.00 - 100.00 | 65.00 - 95.00 | 60.00 - 100.00 |                    |
| <b>HADS Anxiety</b>       |                |                |               |                | 0.094 <sup>1</sup> |
| <i>Mean</i>               | 5.76           | 3.55           | 3.73          | 4.56           |                    |
| <i>Range</i>              | 1.00 - 11.00   | 0.00 - 10.00   | 1.00 - 9.00   | 0.00 - 11.00   |                    |
| <b>HADS Depression</b>    |                |                |               |                | 0.968 <sup>1</sup> |
| <i>Mean</i>               | 3.12           | 3.45           | 3.27          | 3.26           |                    |
| <i>Range</i>              | 1.00 - 8.00    | 0.00 - 8.00    | 0.00 - 8.00   | 0.00 - 8.00    |                    |
| <b>ABC</b>                |                |                |               |                | 0.099 <sup>1</sup> |
| <i>Mean</i>               | 78.92          | 88.73          | 79.40         | 81.82          |                    |
| <i>Range</i>              | 46.25 - 96.88  | 58.12 - 100.00 | 43.75 - 93.75 | 43.75 - 100.00 |                    |
| <b>Walk 12</b>            |                |                |               |                | 0.737 <sup>1</sup> |
| <i>Mean</i>               | 10.41          | 11.73          | 9.64          | 10.56          |                    |
| <i>Range</i>              | 4.00 - 23.00   | 0.00 - 25.00   | 3.00 - 19.00  | 0.00 - 25.00   |                    |
| <b>Falls last 6 month</b> |                |                |               |                | 0.944 <sup>1</sup> |
| <i>Mean</i>               | 0.76           | 0.73           | 0.64          | 0.72           |                    |
| <i>Range</i>              | 0.00 - 5.00    | 0.00 - 5.00    | 0.00 - 3.00   | 0.00 - 5.00    |                    |

<sup>1</sup>Kruskal-Wallis test, <sup>2</sup>Chi-squared test. Abbreviations: ABC= Activities-specific Balance Confidence scale, HADS= Hospital Anxiety and Depression scale, IND= indetermined, LEDD= levodopa equivalent daily dose, MCI= mild cognitive impairment, MDS-UPDRS= The Movement Disorder Society-sponsored Revision of the Unified Parkinson's Disease Rating Scale, Mini-BESTest= Mini Balance Evaluation Systems Test, MoCA= Montreal cognitive assessment, PIGD= postural instability gait difficulty, TD= tremor dominant, TUG= Timed Up and Go, TUG Cog= Timed Up and Go test with a serial subtraction task, Walk 12= Walking Impact Scale.

### Supplemental Table 4 Mean decrease accuracy for gait domain responders

Variable Importance as measured by mean decrease accuracy computed by permuting the variables' values and running the prediction again. Columns two to four are the responsiveness level-specific measures. The last two columns are the mean decrease in accuracy over all responsiveness levels.

| <b>Variables</b>                         | <b>NR Mean<br/>Decrease<br/>Accuracy</b> | <b>LR Mean<br/>Decrease<br/>Accuracy</b> | <b>HR Mean<br/>Decrease<br/>Accuracy</b> | <b>Mean Decrease<br/>Accuracy</b> | <b>SD Mean<br/>Decrease<br/>Accuracy</b> |
|------------------------------------------|------------------------------------------|------------------------------------------|------------------------------------------|-----------------------------------|------------------------------------------|
| <b>HADS Anxiety</b>                      | 29.0645483                               | 1.77969553                               | 8.48637949                               | 24.0136382                        | 0.00052927                               |
| <b>ABC</b>                               | -1.0451612                               | 19.2019706                               | -9.0575312                               | 5.89781481                        | 0.00046614                               |
| <b>Physical<br/>activity<br/>subtype</b> | 0.31164265                               | 2.48708793                               | 3.85796838                               | 4.3868792                         | 0.00024907                               |
| <b>Motor subtype</b>                     | -3.350827                                | 5.19884816                               | 0.60009503                               | -0.041483                         | 0.00032469                               |
| <b>Age</b>                               | -11.804806                               | 2.05978143                               | 7.11025282                               | -3.8872271                        | 0.00036443                               |
| <b>TUG Cog</b>                           | -9.7616105                               | 1.63396347                               | 1.68593274                               | -4.8882616                        | 0.00041696                               |
| <b>Steps per day</b>                     | -1.3003353                               | -10.345057                               | 0.3797929                                | -5.0719818                        | 0.00039252                               |
| <b>HADS<br/>Depression</b>               | -6.9088557                               | -8.5380116                               | -2.9184699                               | -10.081729                        | 0.00033205                               |
| <b>LEDD</b>                              | -10.848417                               | -0.1920649                               | -10.889002                               | -12.599431                        | 0.00036224                               |
| <b>Cognitive<br/>subtype</b>             | -6.2912031                               | -11.107545                               | -8.0759163                               | -13.061329                        | 0.00022496                               |
| <b>Falls last 6<br/>months</b>           | -11.165964                               | -5.4543005                               | -7.8288457                               | -13.463287                        | 0.00014165                               |
| <b>MDS-UPDRS III</b>                     | -14.073224                               | -2.4873556                               | -9.2916053                               | -15.391799                        | 0.00036729                               |
| <b>Walk 12</b>                           | -12.441166                               | -5.84955                                 | -9.8413162                               | -16.740802                        | 0.00031773                               |
| <b>Mini-BESTest</b>                      | -11.641504                               | -13.296896                               | -13.200422                               | -20.681043                        | 0.00029884                               |

Abbreviations: ABC= Activities-specific Balance Confidence scale, HADS= Hospital Anxiety and Depression scale, HR = high responder, LEDD= levodopa equivalent daily dose, LR = low responder, MDS-UPDRS= The Movement Disorder Society-sponsored Revision of the Unified Parkinson's Disease Rating Scale, Mini-BESTest= Mini Balance Evaluation Systems Test, MoCA= Montreal cognitive assessment, NR = non-responder, SD = standard deviation, TUG= Timed Up and Go, TUG Cog= Timed Up and Go test with a serial subtraction task, Walk 12= Walking Impact Scale.



Supplemental Table 5 Demographics of the participants in the HiBalance intervention group divided into Physical Activity responders according to steps per day differences (post-pre), non-responders  $\leq 0$  steps per day and high responders  $\geq 500$  steps per day.

|                                 | <i>Non-responder (N=23)</i> | <i>High responder (N=13)</i> | <i>Total (N=36)</i> | <i>p value</i>      |
|---------------------------------|-----------------------------|------------------------------|---------------------|---------------------|
| <b>Age, yrs</b>                 |                             |                              |                     | 0.974 <sup>1</sup>  |
| Mean                            | 70.39                       | 70.54                        | 70.44               |                     |
| Range                           | 62.00 - 83.00               | 61.00 - 81.00                | 61.00 - 83.00       |                     |
| <b>Sex, n (%)</b>               |                             |                              |                     | 0.616 <sup>2</sup>  |
| male                            | 14 (60.9%)                  | 9 (69.2%)                    | 23 (63.9%)          |                     |
| female                          | 9 (39.1%)                   | 4 (30.8%)                    | 13 (36.1%)          |                     |
| <b>Cognitive subtype, n (%)</b> |                             |                              |                     | 0.071 <sup>2</sup>  |
| Non-MCI                         | 15 (65.2%)                  | 12 (92.3%)                   | 27 (75.0%)          |                     |
| MCI                             | 8 (34.8%)                   | 1 (7.7%)                     | 9 (25.0%)           |                     |
| <b>Motor subtype, n (%)</b>     |                             |                              |                     | 0.026 <sup>2</sup>  |
| TD                              | 1 (4.3%)                    | 5 (38.5%)                    | 6 (16.7%)           |                     |
| PIGD                            | 17 (73.9%)                  | 7 (53.8%)                    | 24 (66.7%)          |                     |
| IND                             | 5 (21.7%)                   | 1 (7.7%)                     | 6 (16.7%)           |                     |
| <b>PA subtype, n (%)</b>        |                             |                              |                     | 0.940 <sup>2</sup>  |
| Sedentary                       | 3 (13.0%)                   | 2 (15.4%)                    | 5 (13.9%)           |                     |
| Light movers                    | 8 (34.8%)                   | 5 (38.5%)                    | 13 (36.1%)          |                     |
| Steady movers                   | 12 (52.2%)                  | 6 (46.2%)                    | 18 (50.0%)          |                     |
| <b>LEDD, mg</b>                 |                             |                              |                     | 0.429 <sup>1</sup>  |
| Mean                            | 654.50                      | 557.54                       | 619.49              |                     |
| Range                           | 78.00 - 1385.00             | 0.00 - 1324.00               | 0.00 - 1385.00      |                     |
| <b>MDS-UPDRS III</b>            |                             |                              |                     | 0.489 <sup>1</sup>  |
| Mean                            | 32.61                       | 28.85                        | 31.25               |                     |
| Range                           | 10.00 - 70.00               | 17.00 - 40.00                | 10.00 - 70.00       |                     |
| <b>MDS-UPDRS Total</b>          |                             |                              |                     | 0.468 <sup>1</sup>  |
| Mean                            | 53.26                       | 46.46                        | 50.81               |                     |
| Range                           | 22.00 - 110.00              | 23.00 - 76.00                | 22.00 - 110.00      |                     |
| <b>MoCA</b>                     |                             |                              |                     | 0.288 <sup>1</sup>  |
| Mean                            | 25.87                       | 26.77                        | 26.19               |                     |
| Range                           | 21.00 - 29.00               | 22.00 - 30.00                | 21.00 - 30.00       |                     |
| <b>Mini-BESTest</b>             |                             |                              |                     | 0.486 <sup>1</sup>  |
| Mean                            | 21.17                       | 22.00                        | 21.47               |                     |
| Range                           | 14.00 - 27.00               | 15.00 - 26.00                | 14.00 - 27.00       |                     |
| <b>Mini-BESTest post-pre</b>    |                             |                              |                     | 0.526 <sup>1</sup>  |
| Mean                            | 0.48                        | 1.00                         | 0.67                |                     |
| Range                           | -3.00 - 4.00                | -2.00 - 3.00                 | -3.00 - 4.00        |                     |
| <b>Gait velocity, cm/s</b>      |                             |                              |                     | 0.300 <sup>1</sup>  |
| Mean                            | 122.13                      | 126.88                       | 123.85              |                     |
| Range                           | 82.20 - 150.60              | 91.10 - 150.90               | 82.20 - 150.90      |                     |
| <b>Gait velocity post-pre</b>   |                             |                              |                     | 0.681 <sup>1</sup>  |
| Mean                            | 5.57                        | 6.29                         | 5.83                |                     |
| Range                           | -20.10 - 30.80              | -15.00 - 22.20               | -20.10 - 30.80      |                     |
| <b>Steps per day</b>            |                             |                              |                     | 0.046 <sup>1</sup>  |
| Mean                            | 6124                        | 4647                         | 5590                |                     |
| Range                           | 1858- 10979                 | 1689- 11482                  | 1689- 11482         |                     |
| <b>Steps per day post-pre</b>   |                             |                              |                     | <0.001 <sup>1</sup> |
| Mean                            | -1536                       | 1909                         | -292                |                     |
| Range                           | -3561- -16                  | 516 - 5830                   | -3561- 5830         |                     |
| <b>TUG</b>                      |                             |                              |                     | 0.420 <sup>1</sup>  |
| Mean                            | 10.17                       | 11.02                        | 10.48               |                     |
| Range                           | 6.09 - 15.15                | 7.13 - 15.68                 | 6.09 - 15.68        |                     |
| <b>TUG Cog</b>                  |                             |                              |                     | 0.270 <sup>1</sup>  |
| Mean                            | 13.45                       | 15.11                        | 14.05               |                     |
| Range                           | 7.12 - 19.22                | 10.62 - 23.00                | 7.12 - 23.00        |                     |
| <b>Presence intervention, %</b> |                             |                              |                     | 0.651 <sup>1</sup>  |
| Mean                            | 85.00                       | 83.46                        | 84.44               |                     |
| Range                           | 60.00 - 100.00              | 60.00 - 100.00               | 60.00 - 100.00      |                     |
| <b>HADS Anxiety</b>             |                             |                              |                     | 0.416 <sup>1</sup>  |
| Mean                            | 4.61                        | 3.77                         | 4.31                |                     |
| Range                           | 0.00 - 10.00                | 0.00 - 11.00                 | 0.00 - 11.00        |                     |
| <b>HADS Depression</b>          |                             |                              |                     | 0.867 <sup>1</sup>  |
| Mean                            | 3.09                        | 3.00                         | 3.06                |                     |
| Range                           | 0.00 - 8.00                 | 0.00 - 7.00                  | 0.00 - 8.00         |                     |
| <b>ABC</b>                      |                             |                              |                     | 0.038 <sup>1</sup>  |
| Mean                            | 79.40                       | 86.28                        | 81.89               |                     |

|                           |               |                |                |                    |
|---------------------------|---------------|----------------|----------------|--------------------|
| <i>Range</i>              | 43.75 - 95.31 | 55.62 - 100.00 | 43.75 - 100.00 |                    |
| <b>Walk 12</b>            |               |                |                | 0.047 <sup>1</sup> |
| <i>Mean</i>               | 11.43         | 7.00           | 9.83           |                    |
| <i>Range</i>              | 1.00 - 25.00  | 0.00 - 16.00   | 0.00 - 25.00   |                    |
| <b>Falls last 6 month</b> |               |                |                | 0.374 <sup>1</sup> |
| <i>Mean</i>               | 0.87          | 0.62           | 0.78           |                    |
| <i>Range</i>              | 0.00 - 5.00   | 0.00 - 1.00    | 0.00 - 5.00    |                    |

<sup>1</sup>Kruskal-Wallis test, <sup>2</sup>Chi-squared test. Abbreviations: ABC= Activities-specific Balance Confidence scale, HADS= Hospital Anxiety and Depression scale, IND= indetermined, LEDD= levodopa equivalent daily dose, MCI= mild cognitive impairment, MDS-UPDRS= The Movement Disorder Society-sponsored Revision of the Unified Parkinson's Disease Rating Scale, Mini-BESTest= Mini Balance Evaluation Systems Test, MoCA= Montreal cognitive assessment, PIGD= postural instability gait difficulty, TD= tremor dominant, TUG= Timed Up and Go, TUG Cog= Timed Up and Go test with a serial subtraction task, Walk 12= Walking Impact Scale.

### Supplemental Table 6 Mean decrease accuracy for step domain responders

Variable Importance as measured by mean decrease accuracy computed by permuting the variables' values and running the prediction again. Columns two to three are the responsiveness level-specific measures. The last two columns are the mean decrease in accuracy over all responsiveness levels.

| <i>Variables</i>                 | <i>NR Mean Decrease Accuracy</i> | <i>HR Mean Decrease Accuracy</i> | <i>Mean Decrease Accuracy</i> | <i>SD Mean Decrease Accuracy</i> |
|----------------------------------|----------------------------------|----------------------------------|-------------------------------|----------------------------------|
| <b>ABC</b>                       | 38.2810854                       | 31.0262182                       | 40.4541776                    | 0.00062009                       |
| <b>Motor subtype</b>             | 32.0585585                       | 23.4235466                       | 32.476533                     | 0.0004249                        |
| <b>Falls last 6 months</b>       | 3.26124179                       | 9.59651282                       | 7.32768982                    | 0.00029194                       |
| <b>Walk 12</b>                   | 4.57094082                       | -2.1307511                       | 1.52488751                    | 0.0004047                        |
| <b>Cognitive subtype</b>         | 0.71959957                       | -1.0252763                       | -0.1072767                    | 0.00026133                       |
| <b>TUG Cog</b>                   | -0.1688383                       | -1.1871183                       | -0.351498                     | 0.00034888                       |
| <b>HADS Anxiety</b>              | 3.21198773                       | -5.4843306                       | -0.6779742                    | 0.00028274                       |
| <b>MDS-UPDRS III</b>             | -0.2706883                       | -6.009217                        | -3.5581449                    | 0.00033142                       |
| <b>LEDD</b>                      | -8.8626521                       | 1.47089814                       | -4.2363714                    | 0.00035176                       |
| <b>Physical activity subtype</b> | -9.2879815                       | -8.9835287                       | -11.102966                    | 0.00017726                       |
| <b>Gait velocity</b>             | -10.388193                       | -9.8500047                       | -12.405974                    | 0.00038089                       |
| <b>Mini-BESTest</b>              | -8.1414447                       | -13.327747                       | -12.923019                    | 0.00024772                       |
| <b>Age</b>                       | -12.520852                       | -11.735067                       | -15.066063                    | 0.00039878                       |
| <b>HADS Depression</b>           | -14.95938                        | -10.522877                       | -16.087412                    | 0.00024896                       |

Abbreviations: ABC= Activities-specific Balance Confidence scale, HADS= Hospital Anxiety and Depression scale, HR = high responder, LEDD= levodopa equivalent daily dose, LR = low responder, MDS-UPDRS= The Movement Disorder Society-sponsored Revision of the Unified Parkinson's Disease Rating Scale, Mini-BESTest= Mini Balance Evaluation Systems Test, MoCA= Montreal cognitive assessment, NR = non-responder, SD = standard deviation, TUG= Timed Up and Go, TUG Cog= Timed Up and Go test with a serial subtraction task, Walk 12= Walking Impact Scale.
